# Supplementary material for: Metagenomic binning of a marine sponge microbiome reveals unity in defense but metabolic specialization
Source: PubMed Central journal article supplement (PMC5649159; doi:10.1038/ismej.2017.101), 2017-07-11
Supplement: ismej2017101x11.pdf [file ismej2017101x11.pdf]

Supplementary Table 5 Most common COGs within 10 genes before and after arylsulfatase genes in all clusters of more than 10 genes.

| <b>COG</b> | <b>description</b>                                                                                | <b>SUM</b> | <b>in X of 282 clusters</b> | <b>in % of clusters</b> |
|------------|---------------------------------------------------------------------------------------------------|------------|-----------------------------|-------------------------|
| COG3119    | AsiA, Arylsulfatase A and related enzymes                                                         | 397        | 282                         | 100.00%                 |
| COG0673    | MviM, Predicted dehydrogenases and related proteins                                               | 136        | 98                          | 34.75%                  |
| COG1028    | FabG, Dehydrogenases with different specificities (related to short-chain alcohol dehydrogenases) | 86         | 72                          | 25.53%                  |
| COG5285    | COG5285, Protein involved in biosynthesis of mitomycin antibiotics/polyketide fumonisin           | 107        | 69                          | 24.47%                  |
| COG1653    | UgpB, ABC-type sugar transport system, periplasmic component                                      | 68         | 51                          | 18.09%                  |
| COG1173    | DppC, ABC-type dipeptide/oligopeptide/nickel transport systems, permease components               | 64         | 48                          | 17.02%                  |
| COG0747    | DdpA, ABC-type dipeptide transport system, periplasmic component                                  | 69         | 48                          | 17.02%                  |
| COG0601    | DppB, ABC-type dipeptide/oligopeptide/nickel transport systems, permease components               | 63         | 47                          | 16.67%                  |
| COG4948    | COG4948, L-alanine-DL-glutamate epimerase and related enzymes of enolase superfamily              | 67         | 46                          | 16.31%                  |
| COG0395    | UgpE, ABC-type sugar transport system, permease component                                         | 64         | 46                          | 16.31%                  |
| COG1082    | lolE, Sugar phosphate isomerases/epimerases                                                       | 54         | 46                          | 16.31%                  |
| COG1175    | UgpA, ABC-type sugar transport systems, permease components                                       | 53         | 39                          | 13.83%                  |
